# Supplementary material for: PAV markers in Sorghum bicolour: genome pattern, affected genes and pathways, and genetic linkage map construction
Source: PubMed Central journal article supplement (PMC4361761; doi:10.1007/s00122-015-2458-4), 2015-01-30

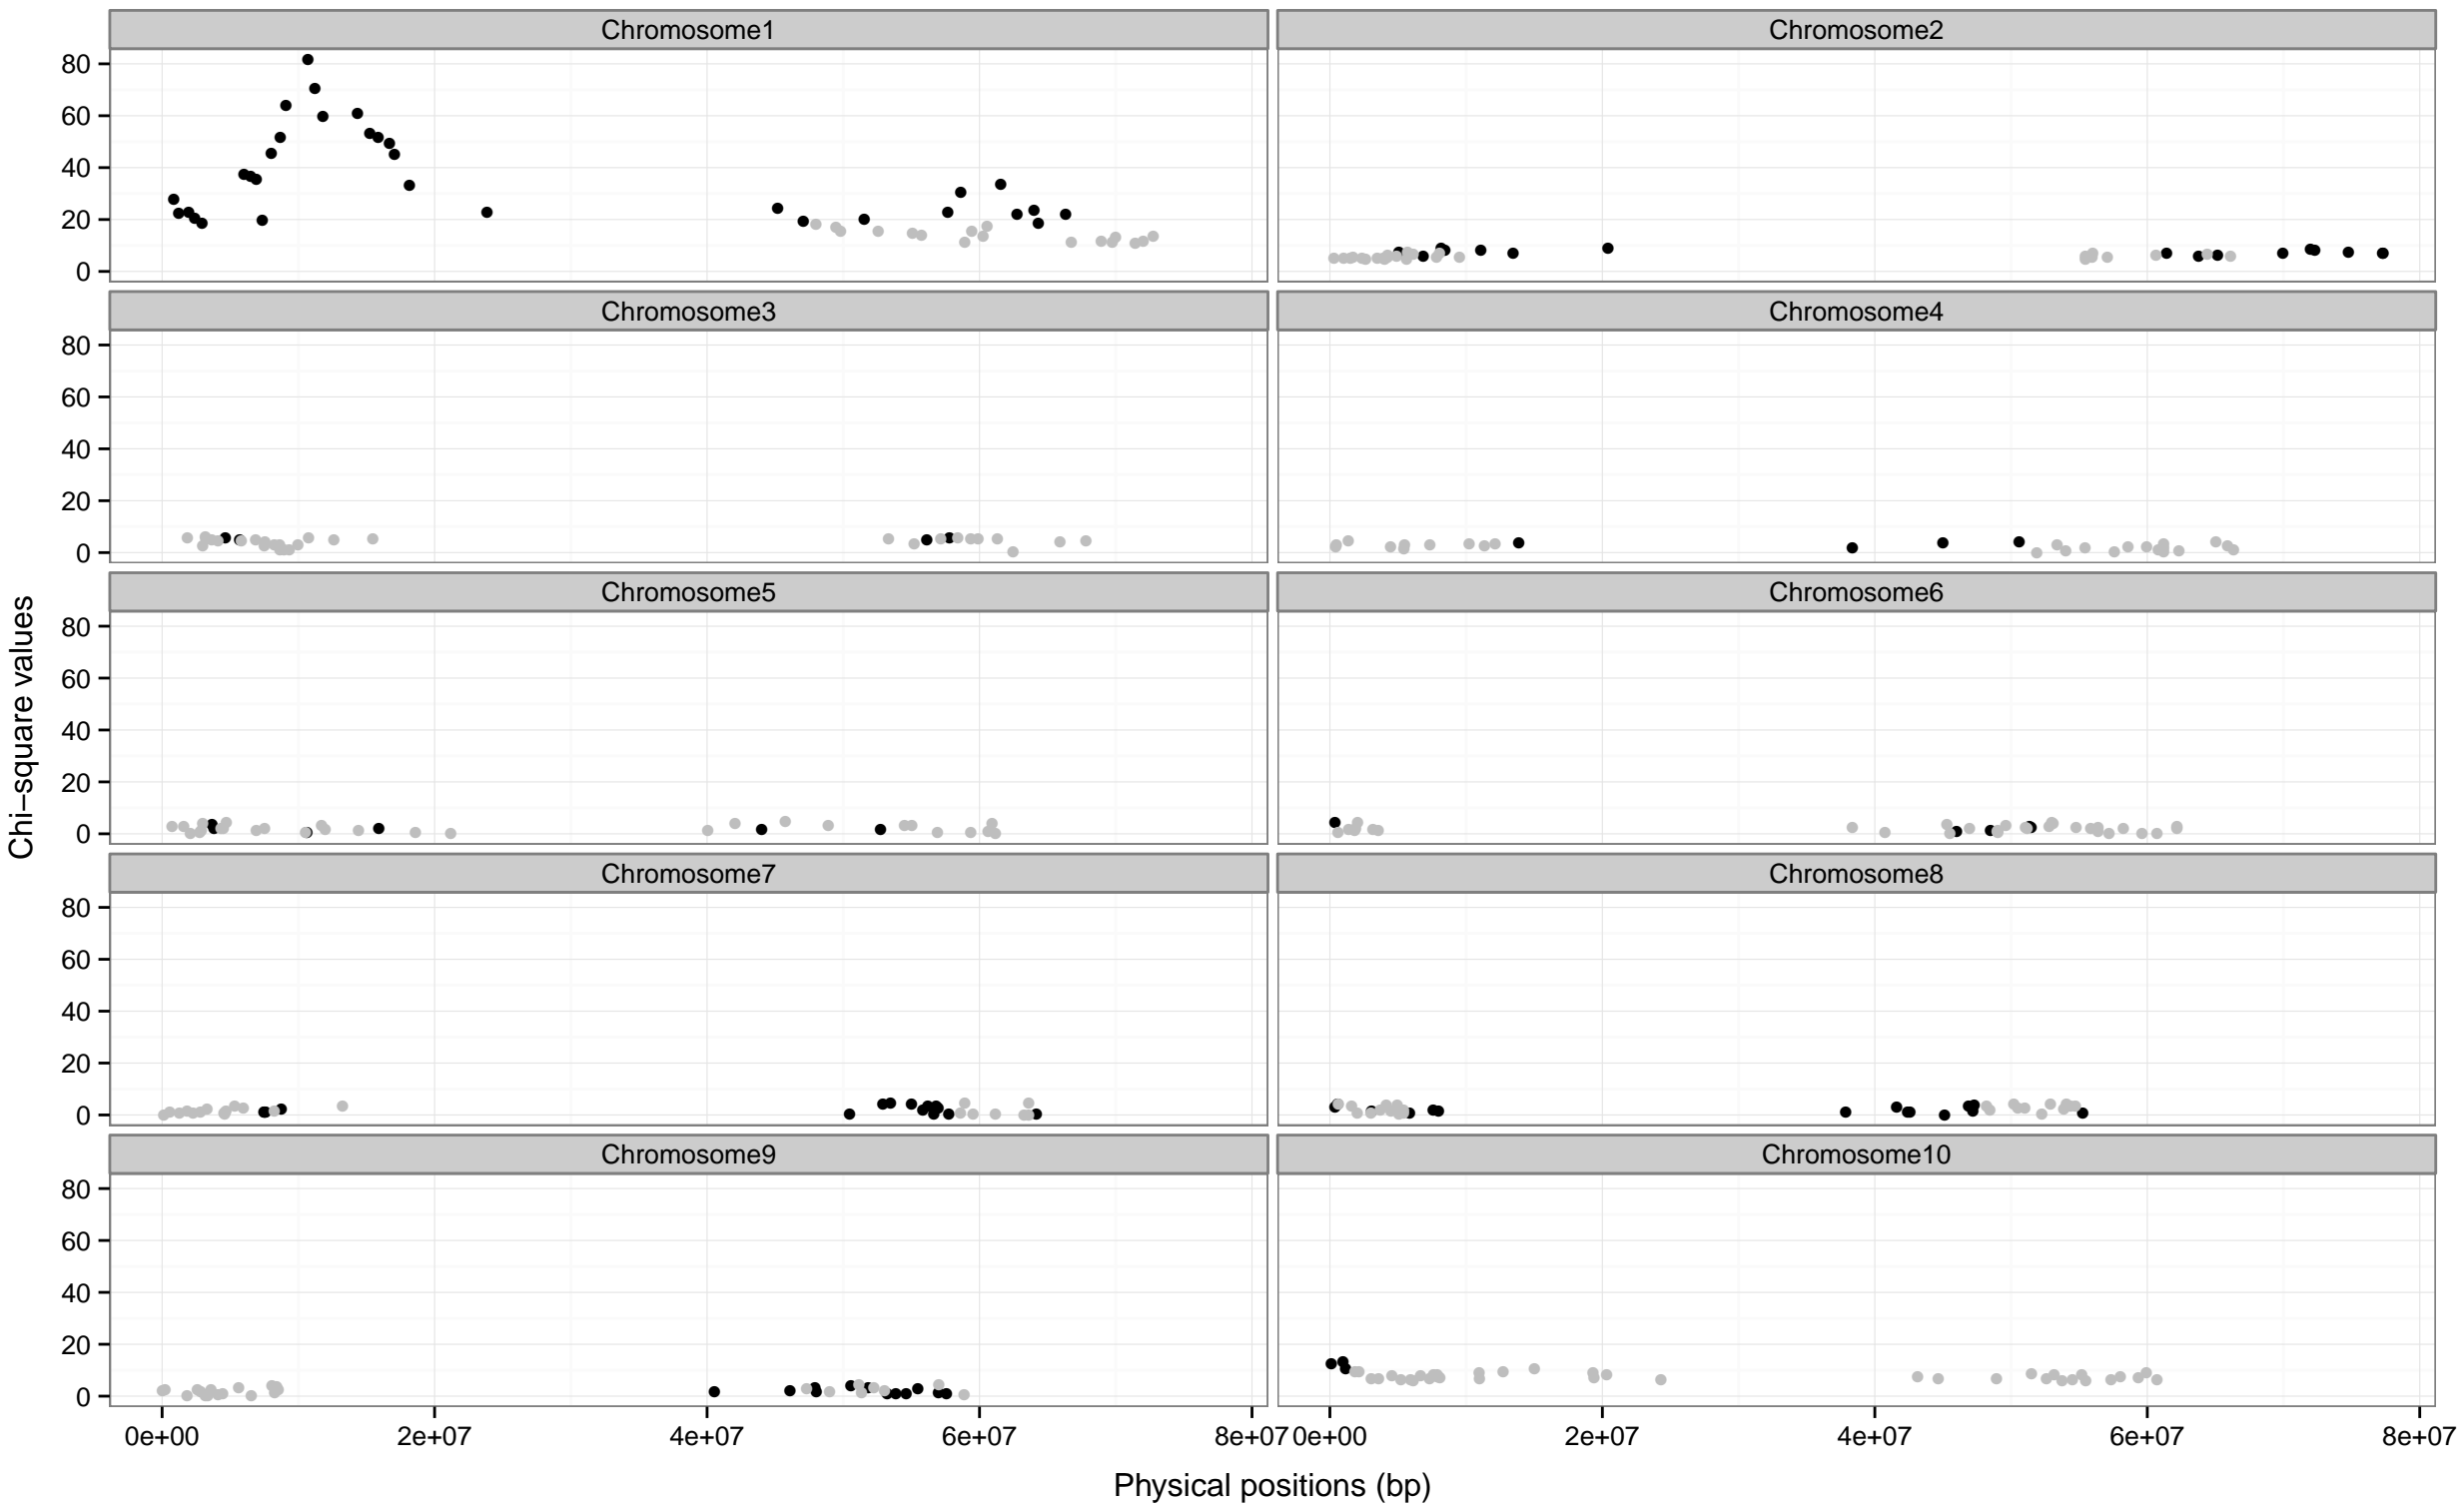

Supplement: 122_2015_2458_MOESM5_ESM.pdf [file 122_2015_2458_MOESM5_ESM.pdf]
